# Supplementary material for: Benchmarking Data-Driven Rainfall-Runoff Models in GreatBritain: A comparison of LSTM-based models with four lumpedconceptual models
Source: Copernicus journal article supplement (doi:10.5194/hess-2021-127), 2021-03-12
Supplement: Supplementary file [file hess-2021-127-AC5-supplement.pdf]

# Response to Reviewers for Manuscript: Benchmarking Data-Driven Rainfall-Runoff Models in Great Britain

Comments/Text of Anonymous Referee posted in **black**, our text in **blue**.

We thank all of the anonymous reviewers for their positive and constructive comments on the manuscript. There are more complete responses to every reviewer comment below. In this paragraph we wanted to summarise the major changes we propose to make to the manuscript in light of these reviews.

- We propose to make the manuscript more concise by moving repetitive figures to Supplementary Information and by making the description of the models and experimental setup more precise.
- We propose to focus more attention on interpreting the performance differences and expanding our discussion and interpretation of the spatial and temporal patterns in performance differences. We aim to reduce the space used by plots that demonstrate performance improvement of the LSTM models.
- We will critically address the role of uncertainty in hydrological predictions and use our ensemble of 8 LSTMs to provide an estimate of predictive uncertainty, updating the plots and performance metrics (where appropriate) to reflect this ensemble spread.

Our responses were also informed by insightful comments about the paper directly from members of the hydrological community. We gratefully received these comments, and used them to inform our responses to the three solicited reviews.
