# Supplementary material for: Benchmarking Data-Driven Rainfall-Runoff Models in GreatBritain: A comparison of LSTM-based models with four lumpedconceptual models
Source: Copernicus journal article supplement (doi:10.5194/hess-2021-127), 2021-03-12
Supplement: Supplementary file [file hess-2021-127-CC2-supplement.pdf]

**Table 4.** NSE Scores comparing the FUSE models against the LSTM / EALSTM. Best score (highest) highlighted in bold.

| Station ID | Name                    | LSTM        | EALSTM      | CLASSIC | JULES | TOPMODEL | ARNOVIC     | PRMS | SACRAMENTO |
|------------|-------------------------|-------------|-------------|---------|-------|----------|-------------|------|------------|
| 12002      | Dee at Park             | <b>0.90</b> | 0.87        | 0.64    | 0.51  | 0.65     | 0.71        | 0.68 | 0.71       |
| 15006      | Tay at Ballathie        | <b>0.95</b> | 0.94        | 0.50    | 0.64  | 0.79     | 0.88        | 0.86 | 0.88       |
| 27009      | Ouse at Skelton         | <b>0.94</b> | 0.91        | 0.78    | 0.69  | 0.86     | 0.89        | 0.88 | 0.91       |
| 27034      | Ure at Kilgram Bridge   | <b>0.88</b> | 0.87        | 0.78    | 0.75  | 0.84     | 0.84        | 0.85 | 0.85       |
| 27041      | Derwent at Buttercrambe | <b>0.92</b> | 0.79        | 0.74    | 0.49  | 0.77     | 0.78        | 0.82 | 0.87       |
| 39001      | Thames at Kingston      | <b>0.95</b> | 0.94        | 0.84    | 0.82  | 0.75     | 0.78        | 0.69 | 0.88       |
| 39081      | Ock at Abingdon         | <b>0.91</b> | 0.86        | 0.80    | -0.21 | 0.73     | 0.81        | 0.76 | 0.82       |
| 43021      | Avon at Knapp Mill      | <b>0.91</b> | <b>0.91</b> | 0.68    | -0.07 | 0.54     | <b>0.91</b> | 0.84 | 0.89       |
| 47001      | Tamar at Gunnislake     | <b>0.94</b> | 0.93        | 0.83    | 0.63  | 0.86     | 0.89        | 0.88 | 0.89       |
| 54001      | Severn at Bewdley       | <b>0.95</b> | 0.91        | 0.77    | 0.61  | 0.88     | 0.88        | 0.87 | 0.92       |
| 54057      | Severn at Haw Bridge    | <b>0.93</b> | <b>0.93</b> | 0.81    | 0.72  | 0.88     | 0.88        | 0.88 | 0.92       |
| 71001      | Ribble at Samlesbury    | <b>0.90</b> | 0.88        | 0.79    | 0.74  | 0.83     | 0.83        | 0.83 | 0.84       |
| 84013      | Clyde at Daldowie       | 0.93        | <b>0.94</b> | 0.82    | 0.82  | 0.87     | 0.88        | 0.85 | 0.88       |
